# Supplementary material for: Identification of multiple independent horizontal gene transfers into poxviruses using a comparative genomics approach
Source: PubMed Central journal article supplement (PMC2268676; doi:10.1186/1471-2148-8-67), 2008-02-27

# Bratke & McLysaght - Supplementary Figure 1

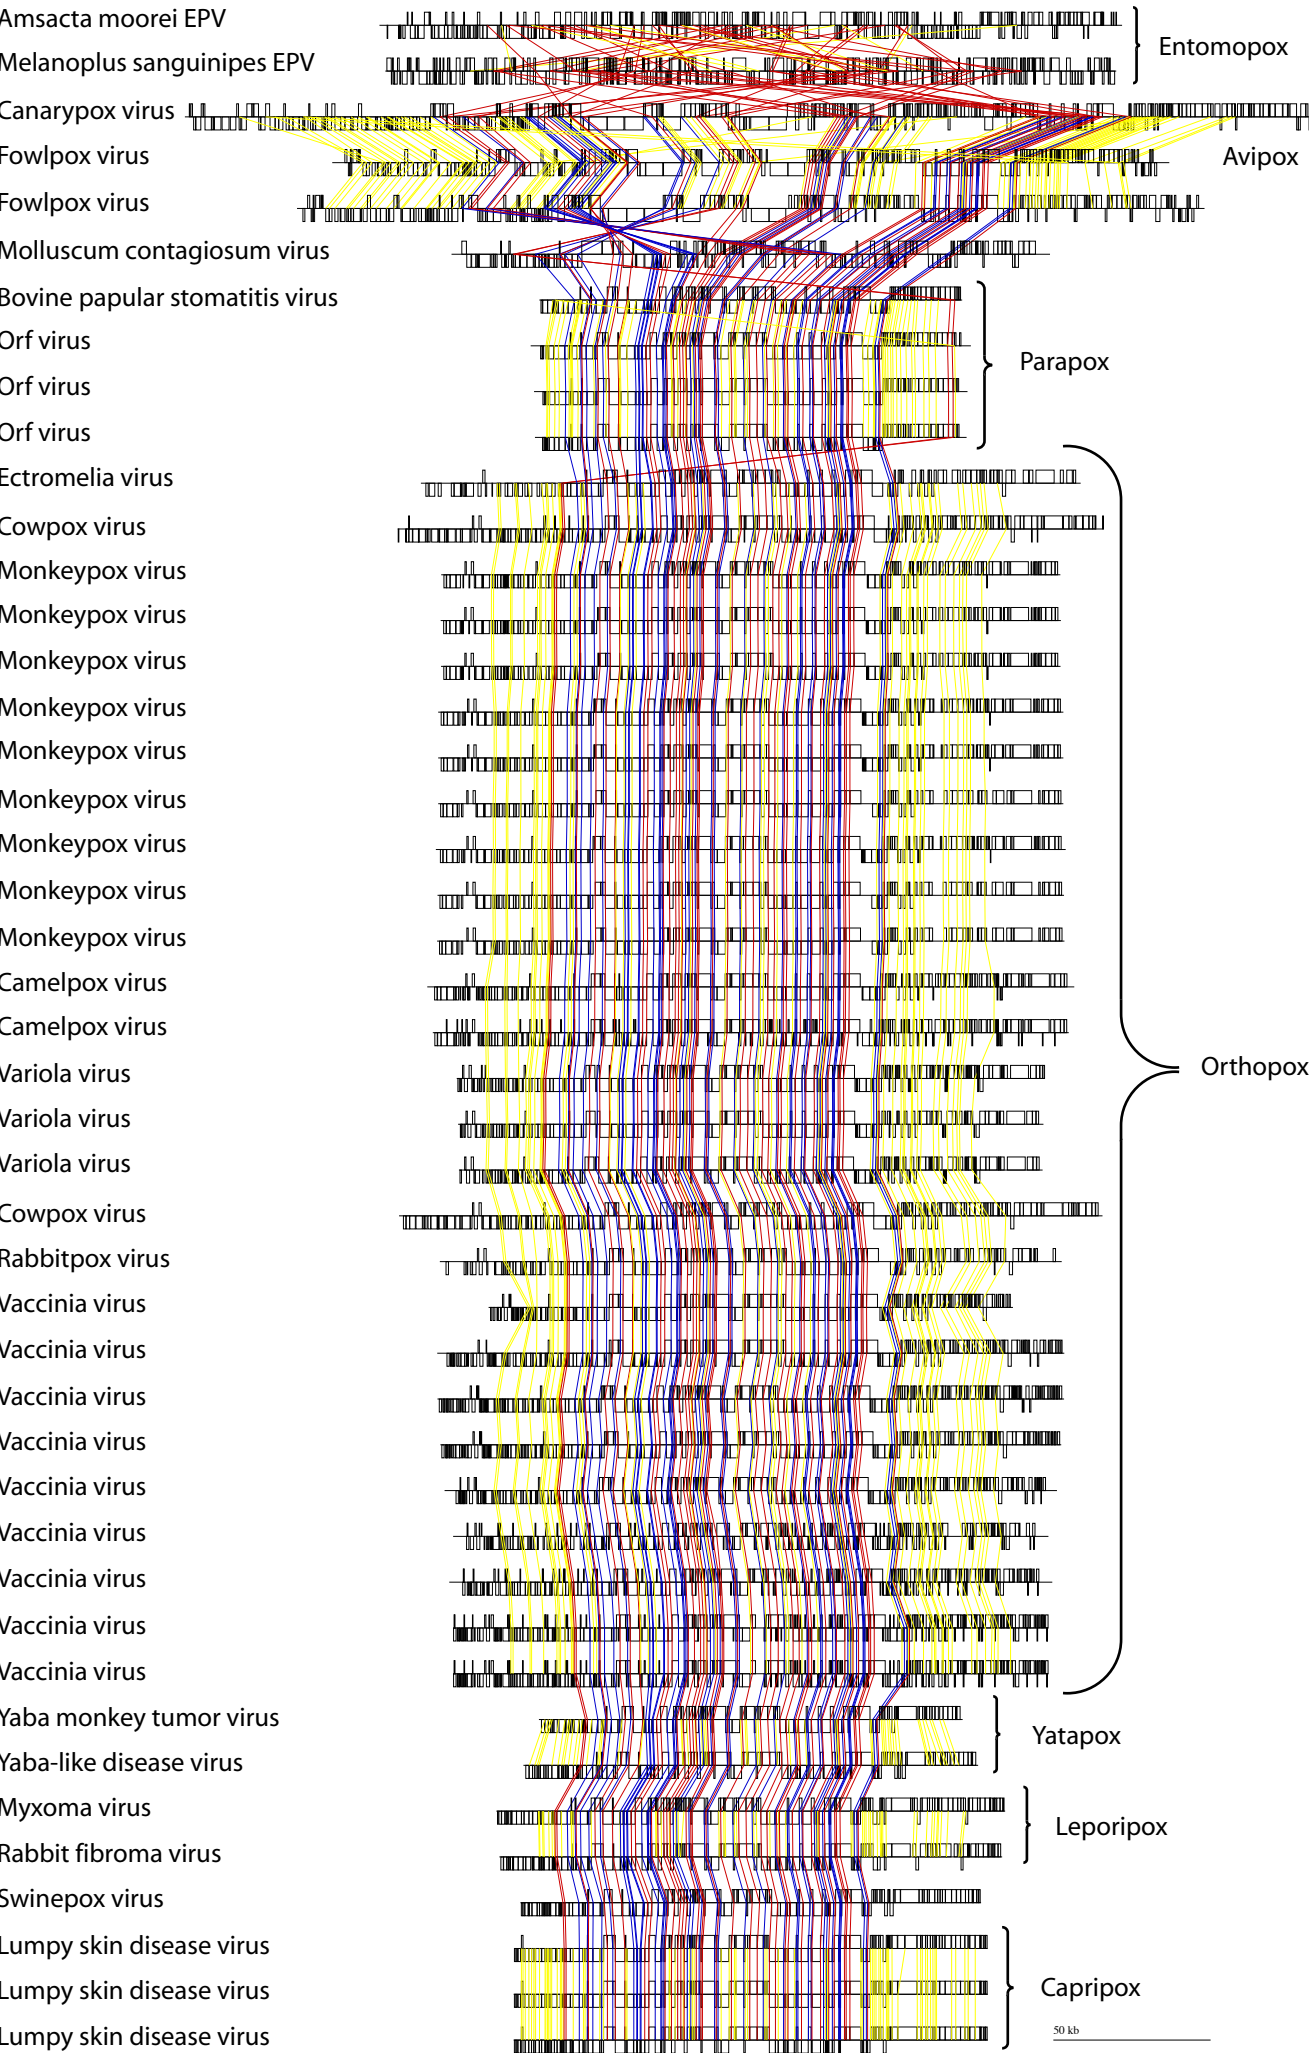

Supplement: 1471-2148-8-67-S1.pdf [file 1471-2148-8-67-S1.pdf]
