# Supplementary material for: Identification of multiple independent horizontal gene transfers into poxviruses using a comparative genomics approach
Source: PubMed Central journal article supplement (PMC2268676; doi:10.1186/1471-2148-8-67), 2008-02-27
Supplement: 1471-2148-8-67-S3.pdf [file 1471-2148-8-67-S3.pdf]

40555956 1 MININILSLLILLSIYANAIDTCYDDQERERTKSNSISSVT-----PEMCKGLK--QLV 54  
12056293 1 ---MKLYFYC--IFFYKIIVT-----I SLN--CGI 23  
21492460 1 MKTNTKIILFC-YVILYLFSC-----VAS-----AKKCDDV---SF 33  
124293 1 -MPSGAL-LCC-LLLLTGMRI-----RGQYSRE-----DNNCTHFP--VGQ 37  
41057562 1 -MANVMYVVLV LNI LLTQIHVS-----NSYCTMCSTGVCKENPHQKQECENTG--HQL 50  
145426904 1 -MPSGAL-LYC-LIFLAGVAAS-----IKS-----ENSCIHF--TSL 33  
83722853 1 -MLSSAL-LCC-PVFLGGTGAS-----RGQDTPA-----ENSCIHF--GGL 37  
18025468 1 MGLRSGLTLCQ-LVILQCLVML-----YLAPA-----CKGVSNCGNL 36  
55742628 1 -MHGSAL-LCCCLVLLAGVGAS-----RHQSTLL-----EDDCTHFP--ASL 38  
55589346 1 -MHSSAL-LCC-LVLLTGVRAS-----PGQGTQS-----ENSC THFP--GNL 37  
48958233 1 MPSSSAV-LCC-LVFLAGVAAS-----RDASTLS-----DSSCTHFP--ASL 38  
299469 1 -MFRA SL-LCC-LVLLAGVWAD-----NKYDSES-----GDDCPTLP--TSL 37  
2497336 1 -MHSSAL-LCY-LVFLAGVGAS-----RDRGTQS-----ENSC THFP--TSL 37

40555956 55 ATK-LKDARQKEKLVNDYFTGRDNDLSY-MLLQGVRETHKKPCGCYVLYLLLSFYRKTIRDTIQSNK 119  
12056293 24 EHNE LNNIKNIFFKVRNVVQADDVDHNLRLITPALNNITVSETCFFIYDMFELYLNDV FVKYNTA 90  
21492460 34 DYI-LKDLRSEFSKIKSFVQNNDKENMM-LLSQSM LDKLTSCIGCKSLSDMIKFY LNDVLPNAEKIE 98  
124293 38 SHM-LLELR TAFSQVKTFFQTKDQLDNI-LLTDSLMDQDFKGYLGCQALSEMIQFYLVEVMPQAEKHG 102  
41057562 51 PHM-LRELRAAFGKVK TFFQMKDQLHSL-LLTQSL LDDFKGYLGCQALSEMIQFYLEEVMPQAE NHG 115  
145426904 34 PHM-LRELRAAFGPKV SFFQTKDQMGDL-LLTGSLLLEDFKGYLGCQALSEMIQFYLEDVMPKAESDG 98  
83722853 38 PHM-LRELRAAFGRVK TFFQSKDQLNSM-LLTESLLEDLKG YLGCQALSEMIQFY LKDVMPPAENHS 102  
18025468 37 PHM-LRDLRDAFSRVK TFFQMKDQLDNI-LLKESLLEDFKGYLGCQALSEMIQFYLEEVMPQAE NQD 101  
55742628 39 PHM-LRELRAAFGRVK IFFQMKDKLDNI-LLTGSLLLEDFKSYLGCQALSEMIQFYLEEVMPRAENHD 103  
55589346 38 PNM-LRDLRDAFSRVK TFFQMKDQLDNL-LLKESLLEDFKGYLGCQALSEMIQFYLEEVMPQAE NQD 102  
48958233 39 PHM-LRELRAAFGKVK TFFQMKDQLNSM-LLTQSLLDDFKGYLGCQALSEMIQFYLEEVMPQAE NHG 103  
299469 38 PHM-LHELRAAFSRVK TFFQMKDQLDNM-LLDGSLLEDFKGYLGCQALSEMIQFYLEEVMPQAE NHS 102  
2497336 38 PHM-LHELRAAFSRVK TFFQMKDQLDNM-LLNGSLLEDFKGYLGCQALSEMIQFYLEEVMPQAE NHG 102

40555956 120 -HASI-NAELTNLAVSVLS--LEDLLDACG--ITCNPKKDSL LKRIE EYMK EHGDDAIYKLI GEIEF 180  
12056293 91 LKLNI-LKSLSSVANNFLAIFNKVKRRVKK-----NNVN-VLEIKKLL--LIDNNCKKLFSEIDI 147  
21492460 99 ---HI-KNKITSIGEKLKS--LKEKLI SCDFLHCENHDE--IKAVKTI FNLKDKGIYKAMGEFDI 156  
124293 103 --PEI-KEHLNSLGEK LKT--LRMLRRCHRFLKCNKSKA-VEQVKSDFNKLEDQGVYKAMNEFDI 163  
41057562 116 --PDI-KEHVNSLGEK LKT--LRLR LRRCHRFLPCENKSKA-VEKVKRVFSE LQERGVYKAMSEFDI 176  
145426904 99 --EDI-KEHVNSLGEK LKT--LRLR LRRCHRFLPCEDKSKA-VEEVKSAFSK LQERGVYKAMGEFDI 159  
83722853 103 --PAI-REHVNSLGENLKT--LRLR LRRCHRFLPCENKSKA-VEQVKSAFSK LQEEGVYKAMSEFDI 163  
18025468 102 --PHA-KEHVNSLGENLKT--LRLR LRRCHRFLPCENKSKA-VEQVKNAFSK LQEKGVYKAMSEFDI 162  
55742628 104 --PDI-KNHVNSLGEK LKT LRLR LRRCHRFLPCENKSKA-VEQVKSAFSK LQEKGVYKAMSEFDI 166  
55589346 103 --PDI-KHVNSLGENLKT--LRLR LRRCHRFLPCENKSKA-VEQVKNAFNK LQEKGIYKAMSEFDI 163  
48958233 104 --PDI-KEHVNSLGEK LKT--LRLR LRRCHRFLPCENKSKA-VEQVKRVFNMLQERGVYKAMSEFDI 164  
299469 103 --TDQEKDKVNSLGEK LKT--LRVRLRRCHRFLPCENKSKA-VEQVKSAFSK LQEKGVYKAMSEFDI 164  
2497336 103 --PDI-KEHVNSLGEK LKT--LRVRLRRCHRFLPCENKSKA-VEQVKSAFSK LQEKGVYKAMSEFDI 163

40555956 181 LFQAIERHVY T----- 191  
12056293 148 FLTWMAKI----- 156  
21492460 157 FINHLEKYIVKK----- 168  
124293 164 FINCI EAYMMI KMKS- 178  
41057562 177 FINYIETYM----- 185  
145426904 160 FTNYI EAYMTMKMRKN 175  
83722853 164 FINYI EAYMTMKIKS- 178  
18025468 163 FINYI EAYMTMKIRR- 177  
55742628 167 FINYI EAYMTMRMKI- 181  
55589346 164 FINYI EAYMTMKIRN- 178  
48958233 165 FINYI ESYMTTKM-- 177  
299469 165 FINYI EAYMTTKMKN- 179  
2497336 164 FINYI EAYMTTKMKN- 178
